# Supplementary material for: Deep immunophenotyping reveals endometriosis is marked by dysregulation of the mononuclear phagocytic system in endometrium and peripheral blood
Source: Springer Nature journal article supplement (doi:10.1186/s12916-022-02359-4), 2022-04-14
Supplement: MOESM6 [file 20315650]

Ctrl\_PE

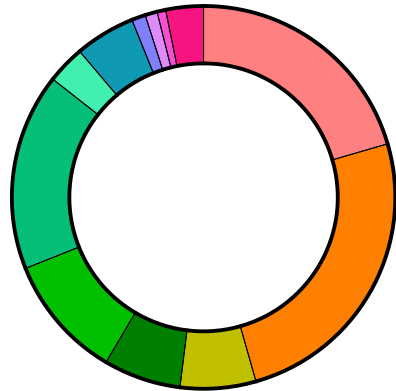

- Macrophages (20.49%)
- Natural Killers (25.09%)
- Neutrophils (6.38%)
- Endothelial Cells (6.52%)
- CD4+ T cells (10.45%)
- Temra (16.64%)
- CD8+ T cells (3.22%)
- CD16+ NK (5.09%)
- CD69+ NK (1.17%)
- B cells (1.02%)
- gd T cells (0.73%)
- cDC1(3.17%)

Endo\_PE

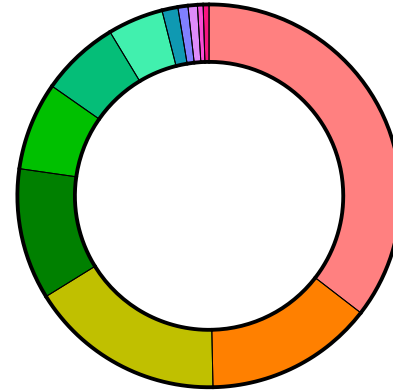

- Macrophages (35.47%)
- Natural Killers (14.21%)
- Neutrophils (16.51%)
- Endothelial Cells (11.09%)
- CD4+ T cells (7.45%)
- Temra (6.64%)
- CD8+ T cells (4.69%)
- CD16+ NK (1.34%)
- CD69+ NK (0.85%)
- B cells (0.79%)
- gd T cells (0.48%)
- cDC1(0.49%)

Ctrl\_SE

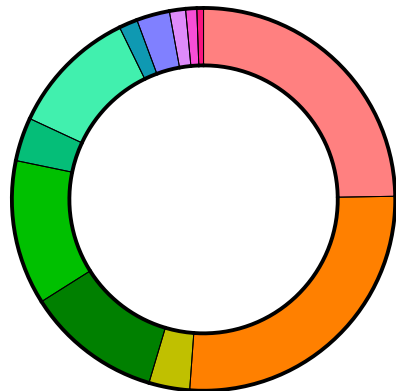

- Macrophages (24.74%)
- Natural Killers (26.41%)
- Neutrophils (3.44%)
- Endothelial Cells (11.43%)
- CD4+ T cells (12.22%)
- Temra (3.68%)
- CD8+ T cells (10.84%)
- CD16+ NK (1.57%)
- CD69+ NK (2.79%)
- B cells (1.35%)
- gd T cells (0.94%)
- cDC1(0.56%)

Endo\_SE

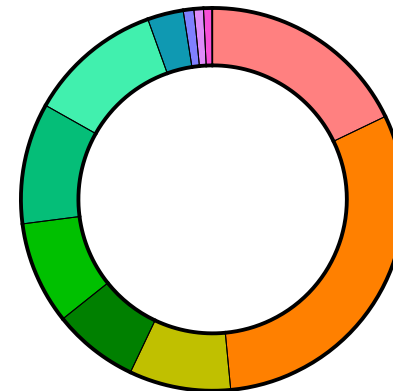

- Macrophages (17.87%)
- Natural Killers (30.62%)
- Neutrophils (8.56%)
- Endothelial Cells (7.22%)
- CD4+ T cells (8.68%)
- Temra (10.22%)
- CD8+ T cells (11.34%)
- CD16+ NK (3.03%)
- CD69+ NK (0.89%)
- B cells (0.81%)
- gd T cells (0.70%)
- cDC1(0.061%)
