# Supplementary material for: Deep immunophenotyping reveals endometriosis is marked by dysregulation of the mononuclear phagocytic system in endometrium and peripheral blood
Source: Springer Nature journal article supplement (doi:10.1186/s12916-022-02359-4), 2022-04-14

A.

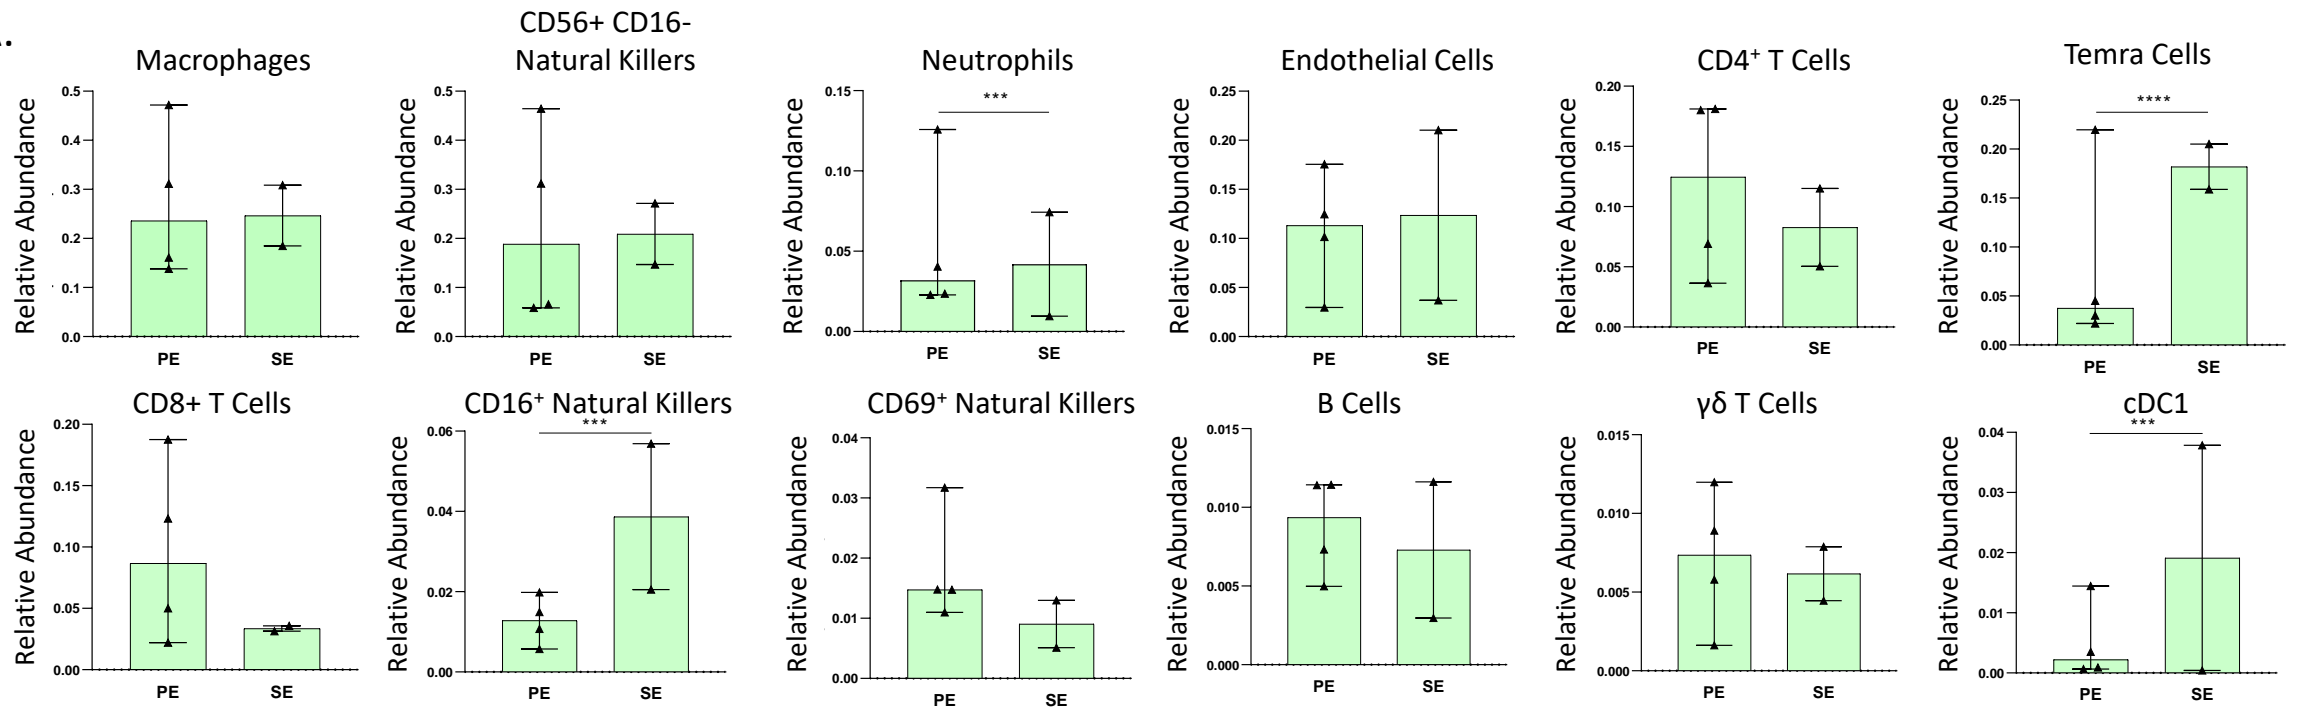

B.

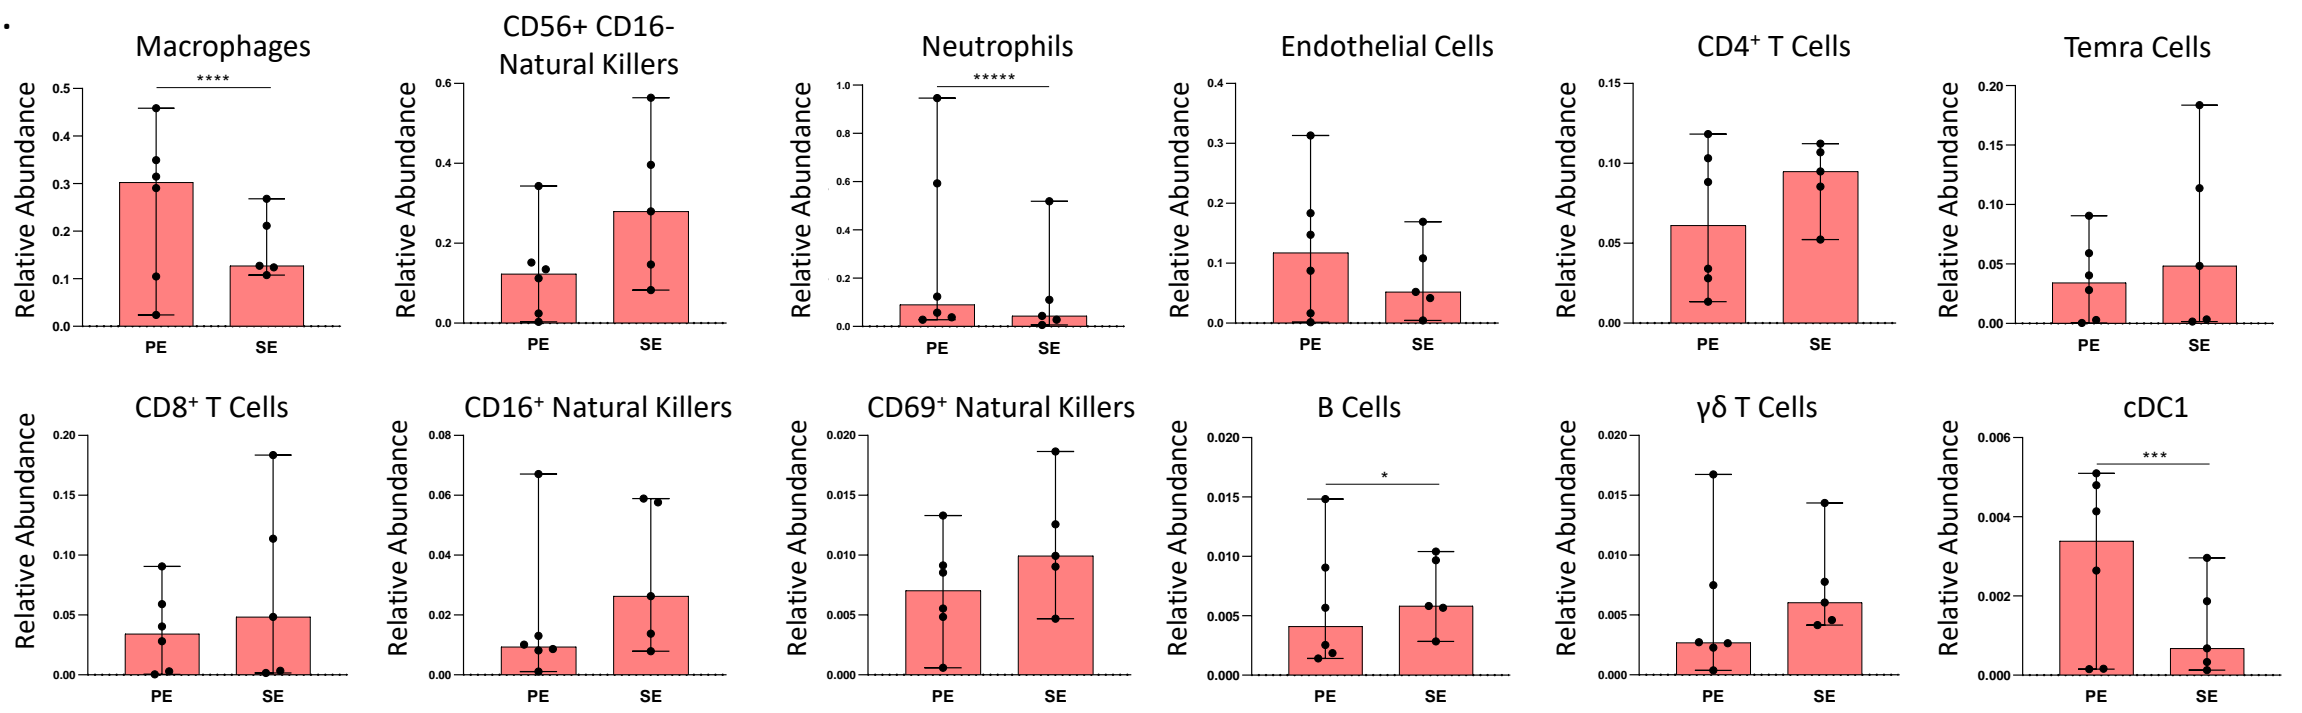

Supplement: MOESM7 [file 20315650]
